# Supplementary material for: Protopine/Gemcitabine Combination Induces Cytotoxic or Cytoprotective Effects in Cell Type-Specific and Dose-Dependent Manner on Human Cancer and Normal Cells
Source: PubMed Central journal article supplement (PMC7912662; doi:10.3390/ph14020090), 2021-01-26
Supplement: pharmaceuticals-14-00090-s001.pdf [file pharmaceuticals-14-00090-s001.pdf]

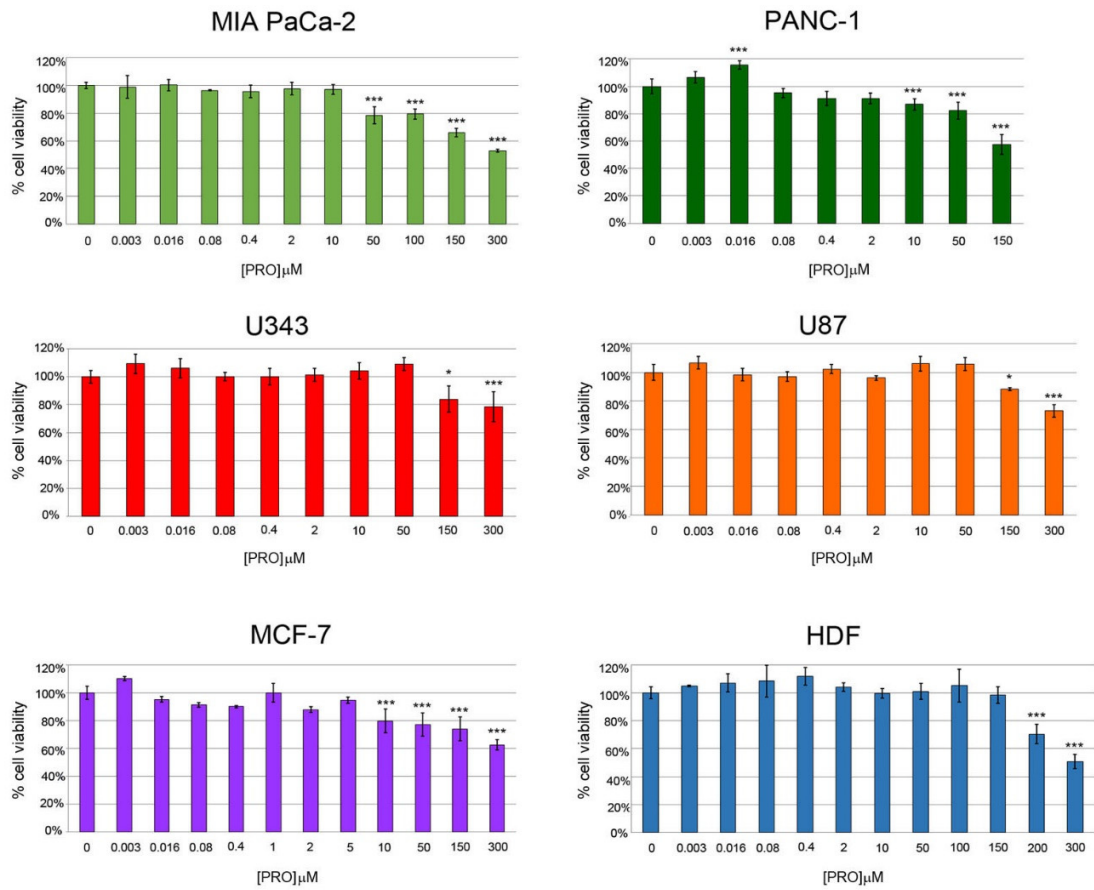

**Figure S1.** PRO differentially affects the viability of MIA PaCa-2, PANC-1, U343, U87, MCF-7 and HDFs. Cell viability was evaluated after treatments with different PRO doses, by using MTT. Graph columns represent mean of viable cells  $\pm$  SD normalized versus control group. The PRO doses ( $\mu$ g) used in treatments are indicated in x-axis. The symbols \* indicate statistical significance versus DMSO. \* p < 0.05; \*\* p < 0.01; \*\*\* p < 0.001.

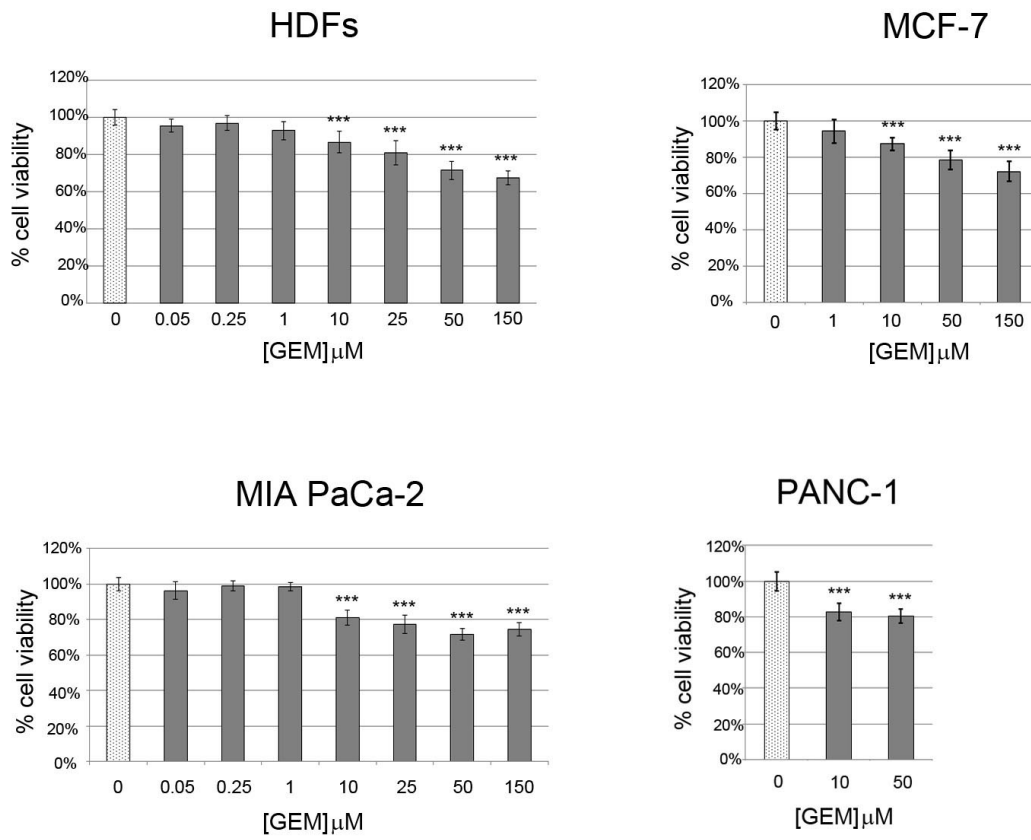

**Figure S2.** Impact of GEM treatments on MIA PaCa-2, PANC-1, MCF-7 cells and HDFs. Changes of cell viability (MTT assay) have been detected after treatments with different GEM doses ( $\mu\text{M}$ ) indicated in x-axis. Graph columns represent mean of viable cells  $\pm$  SD normalized versus control. \*  $p < 0.05$ ; \*\*  $p < 0.01$ ; \*\*\*  $p < 0.001$ .

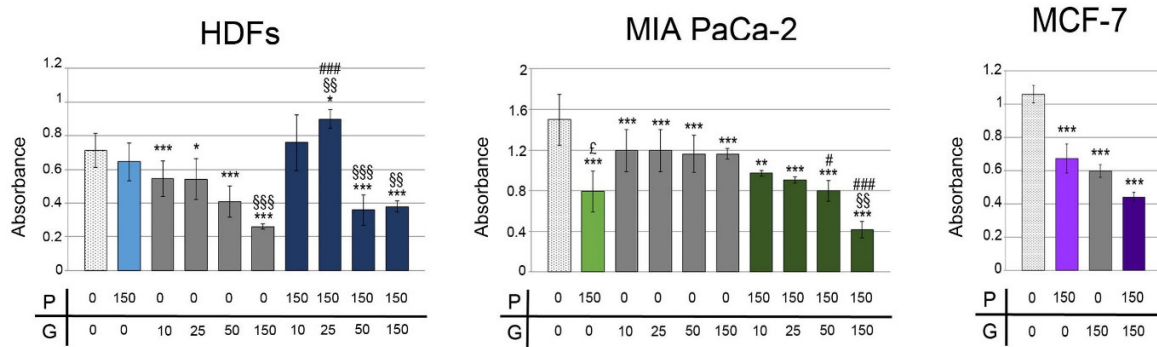

**Figure S3.** Impact of 150 $\mu$ M PRO combined with different doses of GEM on cell viability of HDFs, MIA PaCa-2 and MCF-7 cells (MTT assay). PRO and GEM doses ( $\mu$ M) used in the treatments are indicated in x-axis. Graph columns represent mean  $\pm$  SD of absorbance values. The symbol \* indicates statistical significance versus control. The symbols §, # indicate statistical significance of PRO/GEM combinations versus the corresponding concentration of PRO or GEM, respectively. P= protopine; G= gemcitabine. \*, §, # p < 0.05; \*\*, §§, ## p < 0.01; \*\*\*, §§§, ### p < 0.001.

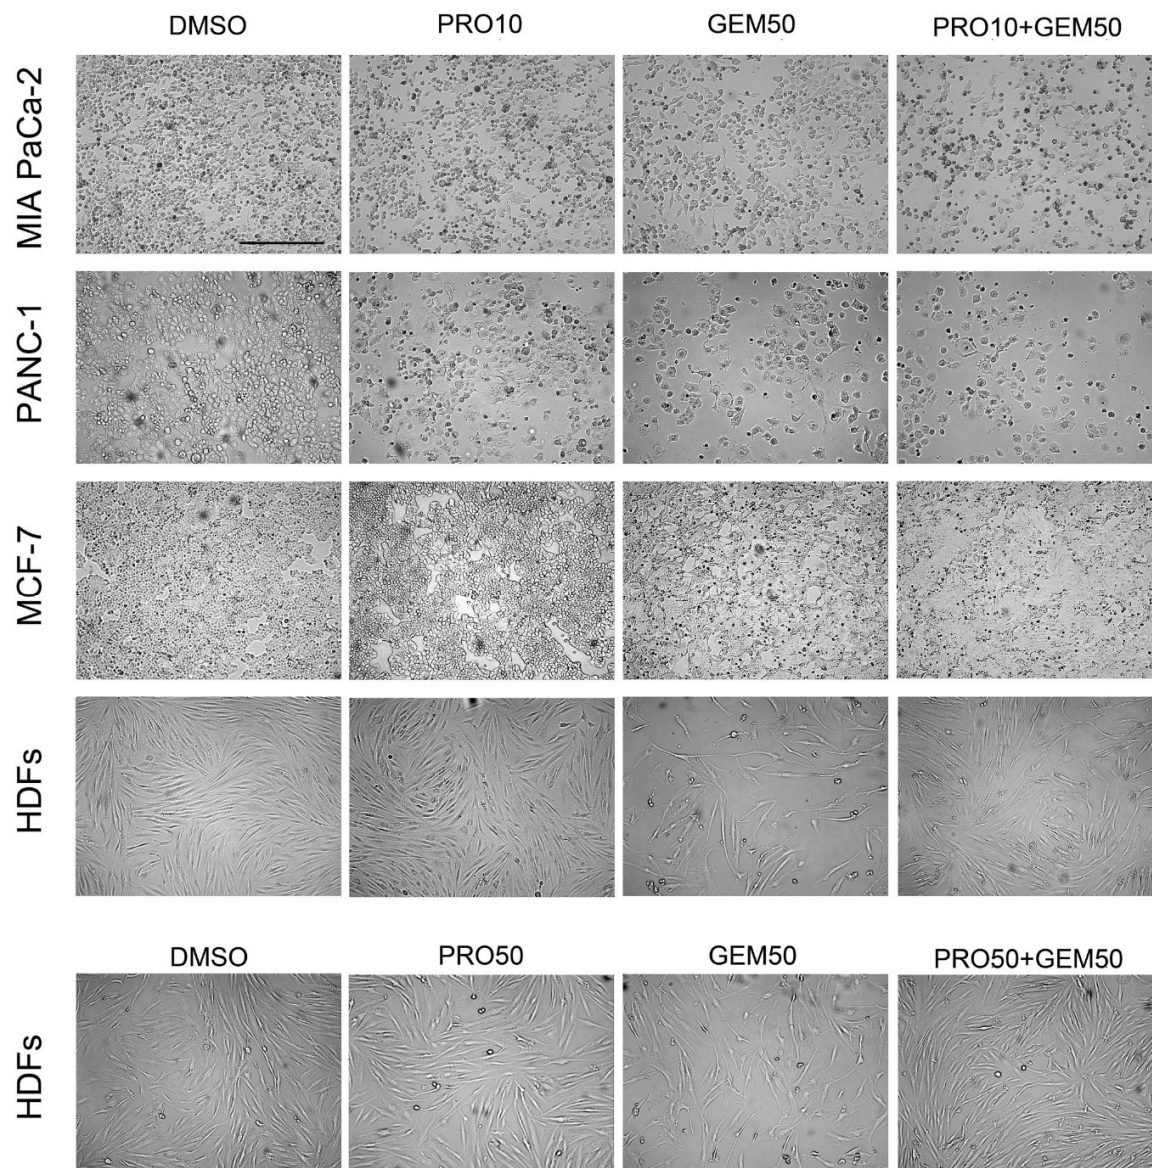

**Figure S4.** MIA PaCa-2, PANC-1, MCF-7 cells and HDFs after PRO/GEM treatments. The images show the cellular density of MIA PaCa-2, PANC-1, MCF-7 cells and HDFs. After exposure to 10 $\mu$ M PRO+50 $\mu$ M GEM, a decrease in the density of MIA PaCa-2 and PANC-1 cells was evident, compared to control. No apparent change of cell density has been observed in HDFs. Scale bar = 500  $\mu$ m, represented in MIA PaCa-2 treated with DMSO, is valid for all images.
